# Supplementary material
Source: PubMed Central journal article supplement (PMC5539956)
Supplement: NIHMS884288-supplement-Supplement.pdf [file NIHMS884288-supplement-Supplement.pdf]

## Supporting Information

**Title:** Novel focused ultrasound gene therapy approach non-invasively restores dopaminergic neuron function in a rat Parkinson's disease model

**Authors:** Brian P. Mead<sup>1</sup>; Namho Kim<sup>2</sup>; G. Wilson Miller<sup>1,3</sup>; David Hodges<sup>1</sup>; Panagiotis Mastorakos<sup>2,4</sup>; Alexander L. Klibanov<sup>1,5</sup>; James W. Mandell<sup>6</sup>; Jay Hirsh<sup>7</sup>; Jung Soo Suk<sup>2\*</sup>; Justin Hanes<sup>2\*</sup>; Richard J. Price<sup>1\*</sup>

<sup>1</sup> Department of Biomedical Engineering, University of Virginia

<sup>2</sup> Center for Nanomedicine at the Wilmer Eye Institute, Johns Hopkins University School of Medicine

<sup>3</sup> Department of Radiology and Medical Imaging, University of Virginia

<sup>4</sup> Present Address: Department of Neurological Surgery, University of Virginia

<sup>5</sup> Cardiovascular Division, University of Virginia

<sup>6</sup> Department of Pathology, University of Virginia

<sup>7</sup> Department of Biology, University of Virginia

\*Corresponding Authors:

Richard J. Price, Ph.D.  
Department of Biomedical Engineering  
Box 800759, Health System  
University of Virginia  
Charlottesville, VA 22908, USA  
Telephone: (434) 924-0020  
Email: rprice@virginia.edu

Justin Hanes, Ph.D.  
Center for Nanomedicine at the Wilmer Eye Institute  
Johns Hopkins University School of Medicine  
400 N. Broadway, 6<sup>th</sup> Floor  
Baltimore, MD 21231, USA  
Telephone: (443) 287-7921  
Email: hanes@jhmi.edu

Jung Soo Suk, Ph.D.  
Center for Nanomedicine at the Wilmer Eye Institute  
Johns Hopkins University School of Medicine  
400 N. Broadway, Robert H. and Clarice Smith Building, 6029  
Baltimore, MD 21231, USA  
Telephone: (410) 614-4526  
Email: jsuk@jhmi.edu

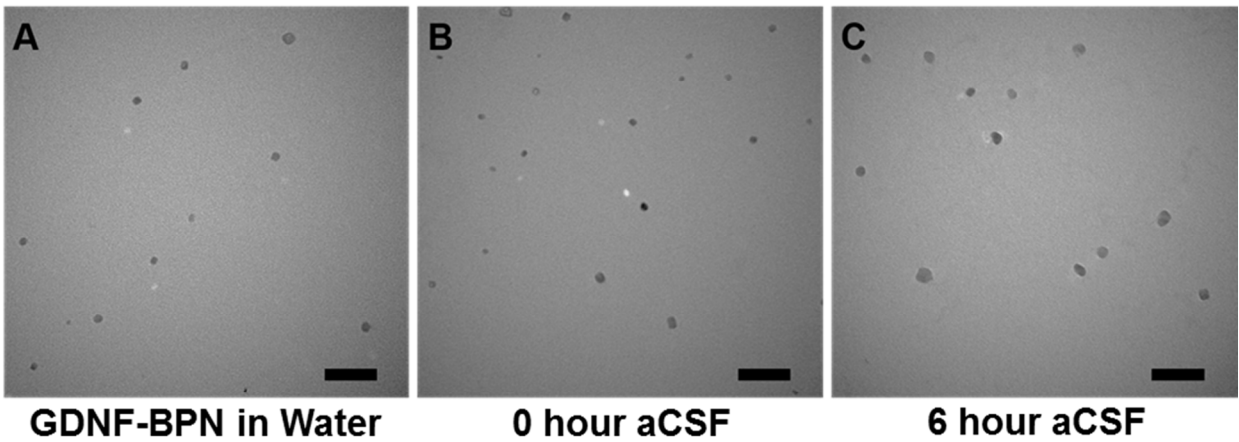

**Figure S1.** GDNF-BPN are colloiddally stable when incubated in water or artificial cerebrospinal fluid (aCSF). Representative transmission electron microscope images of GDNF-BPN in (A) ultrapure water, (B) immediately after mixing in aCSF, or (C) after 6 hours of incubation in aCSF. Scale bar = 200 nm.

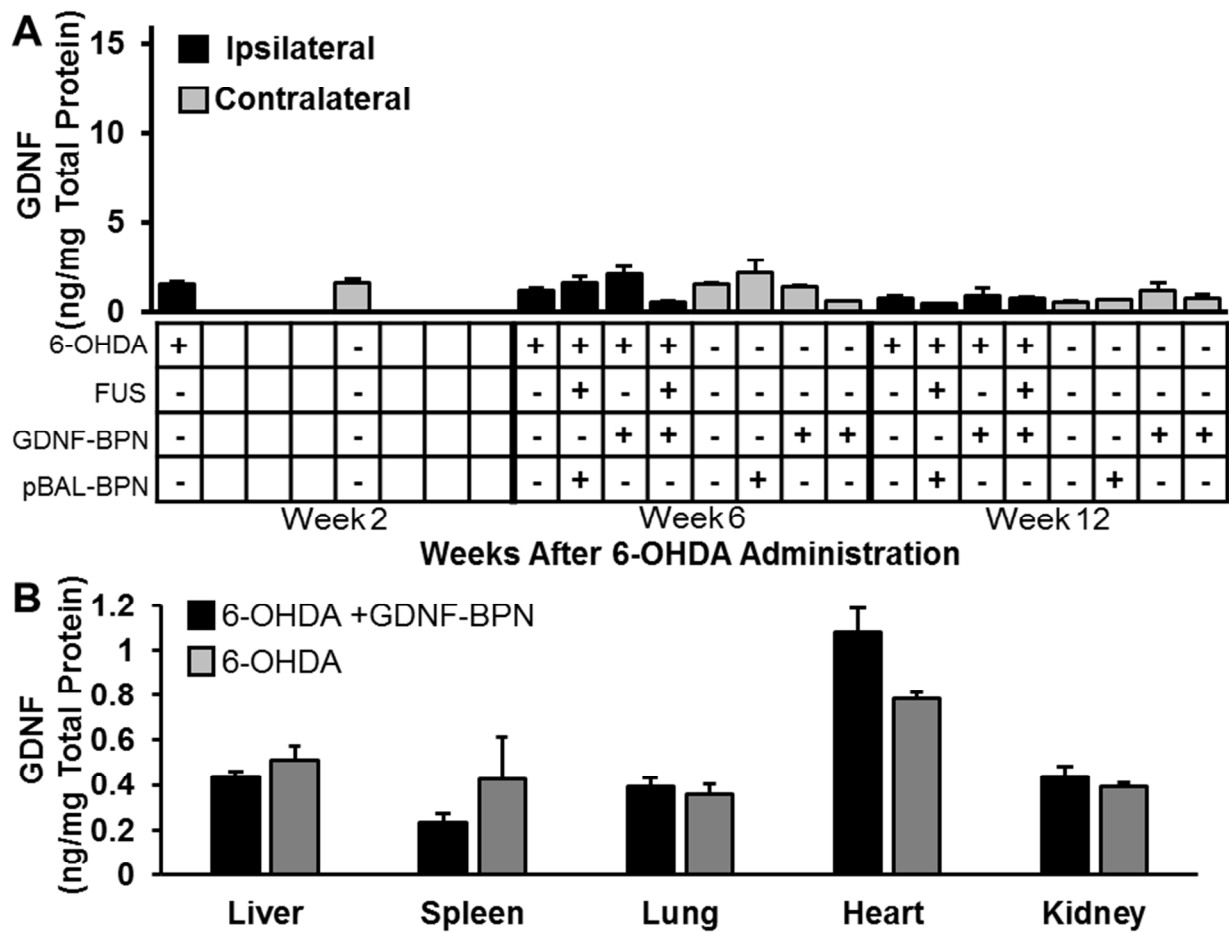

**Figure S2.** FUS-mediated delivery of GDNF-BPN to the striatum of PD rats does not change GDNF protein levels in the SNpc or other major organs. (A) Bar graphs show GDNF protein levels in the ipsilateral (black) and contralateral (gray) SNpc.  $n = 5$  (6-OHDA +FUS +GDNF-BPN),  $n = 4$  (6-OHDA only) or  $n = 3$  in each group at each time point. (B) Bar graph shows GDNF protein levels in animals 6-OHDA treated (gray) or 6-OHDA + GDNF-BPN treated (black) animals.  $n = 3$  (6-OHDA) or  $n = 5$  (6-OHDA + GDNF-BPN).

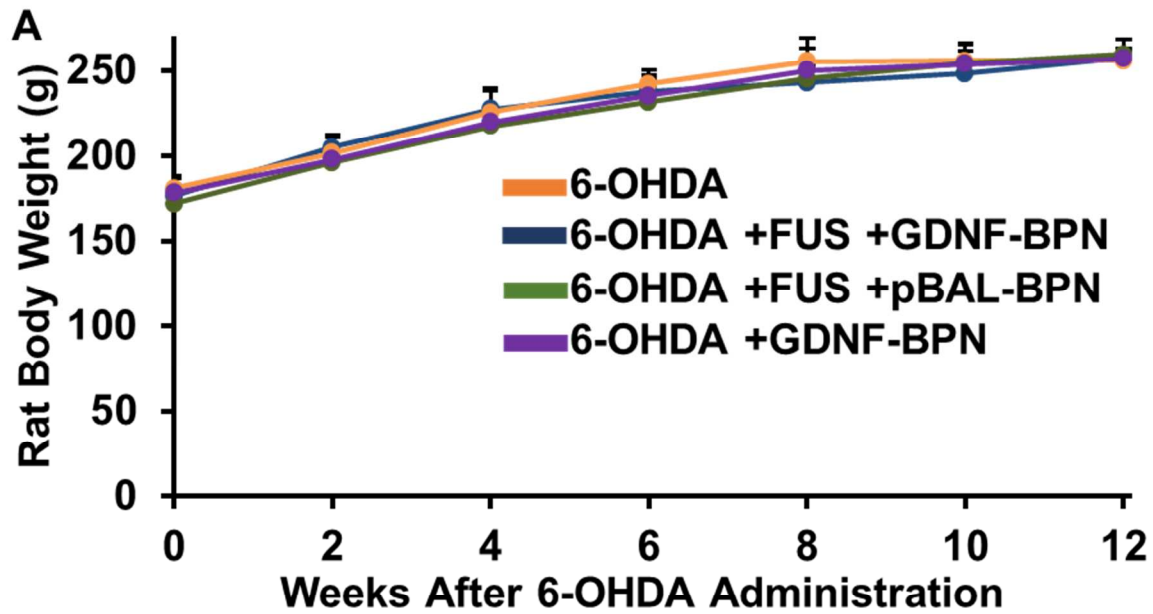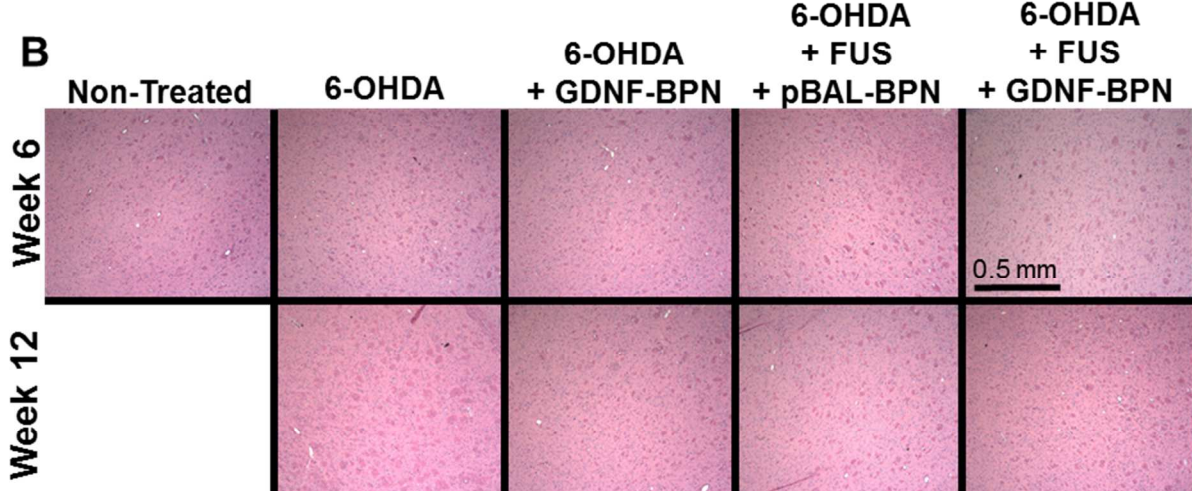

**Figure S3.** FUS-mediated delivery of GDNF-BPN to the striatum of PD rats does not lead to systemic or local toxicity. (A) Line graph shows animal weights for all animals used in the study.  $n > 14$  at each group at Week 0 through 6;  $n > 7$  at each group at Week 8 through 12. (B) Representative images from H&E stained sections through the striatum 6 or 12 weeks after 6-OHDA administration. No signs of toxicity beyond the needle injection tract were found.

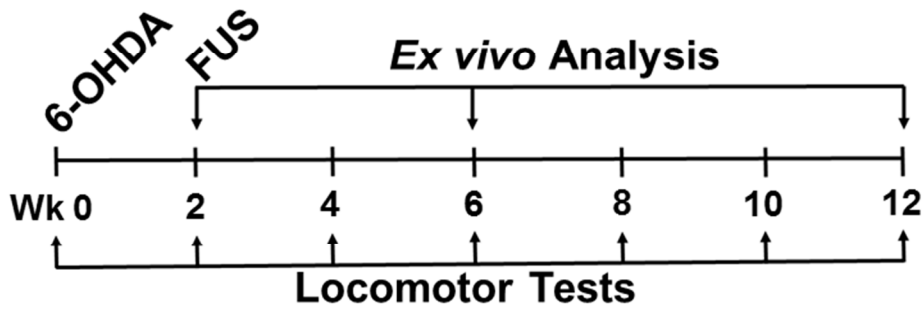

**Figure S4.** Time schedule of study. Rats received intrastriatal 6-OHDA at week 0 and locomotor function was examined 1-3 days prior to 6-OHDA administration and biweekly with apomorphine-induced rotational behavior and cylinder forepaw use bias tests. Animals were sacrificed at week 2, 6 or 12 and brains were either homogenized or fixed/sectioned for further *ex vivo* analysis.

**Tables:**

**Table S1.** Dopamine Metabolites in the Ipsilateral Striatum

| DOPAC<br>(ng/mg tissue) | 6-OHDA        | 6-OHDA<br>+ GDNF-BPN | 6-OHDA<br>+ FUS<br>+ pBAL-BPN | 6-OHDA<br>+ FUS<br>+ GDNF-BPN |
|-------------------------|---------------|----------------------|-------------------------------|-------------------------------|
| Week 2                  | Not Detected  |                      |                               |                               |
| Week 6                  | 0.194 ± 0.083 | 0.109 ± 0.047        | 0.309 ± 0.128                 | 2.140 ± 0.200*                |
| Week 12                 | 0.887 ± 0.107 | 0.272 ± 0.088        | 0.393 ± 0.043                 | 3.343 ± 0.657*                |

| HVA<br>(ng/mg tissue) | 6-OHDA        | 6-OHDA<br>+ GDNF-BPN | 6-OHDA<br>+ FUS<br>+ pBAL-BPN | 6-OHDA<br>+ FUS<br>+ GDNF-BPN |
|-----------------------|---------------|----------------------|-------------------------------|-------------------------------|
| Week 2                | 0.071 ± 0.011 |                      |                               |                               |
| Week 6                | 0.349 ± 0.072 | 0.080 ± 0.015        | 0.087 ± 0.034                 | 0.375 ± 0.023‡                |
| Week 12               | 0.289 ± 0.050 | 0.132 ± 0.028        | 0.104 ± 0.019                 | 1.24 ± 0.351*                 |

\* P < 0.05 vs all other groups at the same time point. ‡ p < 0.05 vs 6-OHDA + FUS + pBAL-BPN and 6-OHDA + GDNF-BPN groups at the same time point.
